1 **The combined treatment of Molnupiravir and Favipiravir results in a marked potentiation of antiviral**  
2 **efficacy in a SARS-CoV-2 hamster infection model**

3 Rana Abdelnabi<sup>1#\*</sup>, Caroline S. Foo<sup>1#</sup>, Suzanne J. F. Kaptein<sup>1</sup>, Xin Zhang<sup>1</sup>, Lana Langendries<sup>1</sup>, Laura  
4 Vangeel<sup>1</sup>, Judith Breuer<sup>2</sup>, Juanita Pang<sup>2</sup>, Rachel Williams<sup>2</sup>, Valentijn Vergote<sup>1</sup>, Elisabeth Heylen<sup>1</sup>, Pieter  
5 Leyssen<sup>1</sup>, Kai Dallmeier<sup>1</sup>, Lotte Coelmont<sup>1</sup>, Dirk Jochmans<sup>1</sup>, Arnab K. Chatterjee<sup>3</sup>, Steven De Jonghe<sup>1</sup>,  
6 Birgit Weynand<sup>4</sup>, Johan Neyts<sup>1,5\*</sup>.

7 1. KU Leuven Department of Microbiology, Immunology and Transplantation, Rega Institute for  
8 Medical Research, Laboratory of Virology and Chemotherapy, B-3000 Leuven, Belgium.

9 2. UCL Institute of Child Health, 30 Guilford Street, London, WC1N 1EH, United Kingdom.

10 3. Calibr at Scripps Research, La Jolla, CA, USA.

11 4. KU Leuven Department of Imaging and Pathology, Translational Cell and Tissue Research, B-3000  
12 Leuven, Belgium; Division of Translational Cell and Tissue Research.

13 5. Global Virus Network, GVN.

14 **#R.A. and C.S.F. contributed equally to this work**

15 \*To whom correspondence may be addressed. Email: [rana.abdelnabi@kuleuven.be](mailto:rana.abdelnabi@kuleuven.be) and  
16 [johan.neyts@kuleuven.be](mailto:johan.neyts@kuleuven.be).

17

18 **Abstract**

19 Favipiravir and Molnupiravir, orally available antivirals, have been reported to exert antiviral activity  
20 against SARS-CoV2. In recent days preliminary efficacy data have been reported in COVID-19 patients.  
21 We here studied the combined antiviral effect of the drugs in the SARS-CoV2 hamster infection model.  
22 We first demonstrate that Molnupiravir can reduce infectious virus titers in lungs of infected animals  
23 in a dose-dependent manner by up to 3.5 log<sub>10</sub> which is associated with a marked improvement of  
24 virus-induced lung pathology. When animals are treated with a combination of suboptimal doses of  
25 Molnupiravir and Favipiravir (that each alone result in respectively a 1.3 log<sub>10</sub> and 1.1 log<sub>10</sub> reduction  
26 of infectious virus titers in the lungs), a marked combined potency is observed. Infectious virus titers  
27 in the lungs of animals treated with the combo are on average reduced by 4.5 log<sub>10</sub> and infectious virus  
28 are no longer detected in the lungs of 60% of treated infected animals. Both drugs result in an  
29 increased mutation frequency of the remaining viral RNA recovered from the lungs. In the combo-  
30 treated hamsters an increased frequency of C-to-T and G-to-A mutations in the viral RNA is observed  
31 as compared to the single treatment groups which may explain the pronounced antiviral potency of  
32 the combination. Our findings may lay the basis for the design of clinical studies to test the efficacy of  
33 the combination of Molnupiravir and Favipiravir in the treatment of COVID-19.

34

35 **Keywords**

36 SARS-CoV-2; Antivirals; Molnupiravir; Favipiravir, hamsters, coronavirus

37 **Main text**

38 The severe acute respiratory syndrome coronavirus 2 (SARS-CoV-2) was first identified in Wuhan, China  
39 in December 2019 <sup>1</sup>. Since then, the virus rapidly spread around the globe with more than 115 million  
40 cases and 2.5 million deaths reported until 3<sup>rd</sup> March 2021 [www.covid19.who.int]. Infection with  
41 SARS-CoV-2 results in coronavirus-induced disease (COVID-19) which is characterized by a wide range  
42 of symptoms including fever, dry cough, muscle and/or joint pain, headache, decreased sense of taste  
43 and smell and diarrhea. The disease can progress into severe complications such as acute respiratory  
44 distress syndrome (ARDS), respiratory failure, septic shock as well as multi-organ failure, which are  
45 mainly attributed to a massive cytokine storm and exaggerated immune response <sup>2</sup>.

46 To date, there are no approved, selective coronavirus antivirals to treat or prevent infections. Even  
47 those vaccinated may not all be protected against infection and disease, in particular following  
48 infection with variants that are less susceptible to the current vaccines. Antivirals against SARS-CoV-2  
49 will, at least when given early enough after a positive test or after onset of symptoms, reduce the  
50 chance to progress to (more) severe disease. In addition, such antiviral drugs will be useful to protect  
51 for example healthcare workers and high-risk patients in a prophylactic setting. Such drugs are also  
52 needed for the treatment of immunodeficient patients who do not mount a (sufficiently robust)  
53 immune response following vaccination. Since the *de novo* development and approval of (a) specific,  
54 highly potent antiviral(s) for SARS-CoV-2 may require years, the main focus for COVID-19 treatment in  
55 the current pandemic is to repurpose drugs that have been approved or in clinical trials for other  
56 diseases <sup>3</sup>.

57 We recently demonstrated that the anti-influenza drug Favipiravir results in a pronounced antiviral  
58 activity in SARS-CoV-2-infected hamsters <sup>4</sup>. The efficacy of the drug is currently being explored in  
59 multiple phase II clinical studies. Interim data from a multicenter, open-labeled study of Avifavir  
60 (Favipiravir) in patients with COVID-19, reveals a faster virological response, a shorter time to clinical  
61 symptoms and reduced mortality rates compared to patients receiving the Standard of Care (Corritori

62 et al., Science Spotlight™, Conference on Retroviruses and Opportunistic Infections [CROI] 2021). The  
63 ribonucleoside analogue, N4-hydroxycytidine (NHC, EIDD-1931), was initially developed as an influenza  
64 inhibitor, but exerts also broader-spectrum antiviral activity against multiple viruses belonging to  
65 different families of RNA viruses. Activity against SARS-CoV-2 has been reported in cell lines and  
66 primary human airway epithelial cell cultures <sup>5</sup>.

67 Both Favipiravir and NHC act through lethal mutagenesis. Incorporation into viral RNA results in the  
68 accumulation of deleterious transition mutations beyond a permissible error threshold to sustain the  
69 virus population, leading to error catastrophe <sup>6,7</sup>. The orally bioavailable, pro-drug counterpart of NHC  
70 <sup>8</sup>, Molnupiravir (EIDD-2801, MK-4482) was shown to result in an antiviral effect against SARS-CoV-2 in  
71 a Syrian hamster model <sup>9</sup>, in a mouse model <sup>10</sup> and in ferrets <sup>11</sup>. Data from a first-in-human, phase 1,  
72 randomized, double-blind, placebo-controlled study in healthy volunteers indicate that the drug is well  
73 tolerated and that plasma exposures exceed the expected efficacious doses based on scaling from  
74 animal models <sup>12</sup>. The drug is currently being assessed for its potential as an antiviral treatment of  
75 SARS-CoV-2 infection in Phase 2 clinical trials of infected patients (NCT04405570, NCT04405739). Very  
76 recently interim data (on one secondary objective) were reported in 202 non-hospitalized adults who  
77 had signs or symptoms of COVID-19 and active confirmed SARS-CoV2 infection. At day 5, a reduction  
78 in positive viral culture from nasopharyngeal swabs was noted in subjects who received molnupiravir  
79 (0/47) as compared to placebo (6/25). No safety signals were identified in the 202 participants (Painter  
80 et al., Science Spotlight™, CROI 2021).

81 We here report on the pronounced combined activity of Favipiravir and Molnupiravir in the hamster  
82 infection model.

## 83 **Results**

### 84 **Dose-response efficacy of Molnupiravir against SARS-CoV-2 in Syrian hamsters**

85 We first evaluated the (dose-response) effect of Molnupiravir (EIDD-2801) in SARS-CoV-2-infected  
86 hamsters to select an appropriate dose for the combination study. Briefly, 6-8 weeks female SG

87 hamsters were treated orally with Molnupiravir (either 75, 150, or 200 mg/kg, BID) or the vehicle (i.e.  
88 the control group) for four consecutive days starting one hour before intranasal infection with SARS-  
89 CoV-2. At day four post-infection (pi), the animals were euthanized and lungs were collected for  
90 quantification of viral RNA, infectious virus titers and lung histopathology as described before<sup>4</sup> (Fig.  
91 1A). Molnupiravir treatment resulted in a dose-dependent reduction in the viral RNA copies per mg of  
92 lung tissue with 1.3 ( $P=0.002$ ), 1.9 ( $P<0.0001$ ) and a 3.3  $\log_{10}$  ( $P<0.0001$ ) reduction was noted in the  
93 groups that had been treated BID with 75, 150 or 200 mg/kg, respectively (Fig. 1B). A similar pattern  
94 was observed for the infectious virus load in the lungs whereas the intermediate and high doses, but  
95 not the 75 mg/kg dose BID, significantly reduced infectious virus lung titers (Fig. 1C). The reduction in  
96 infectious virus titers (TCID<sub>50</sub>/mg tissue) in the lungs of hamsters treated BID with 150 and 200 mg/kg  
97 was 1.3 ( $P=0.0002$ ) and 3.5 ( $P<0.0001$ )  $\log_{10}$ , respectively (Fig. 1C). Treatment with 75, 150 and 200  
98 mg/kg Molnupiravir BID significantly reduced the histological lung disease score ( $P=0.0025$ ,  $P=0.005$ ,  
99  $P<0.0001$ , respectively) (Fig. 1D). All the doses studied were well tolerated without significant weight  
100 loss or any obvious adverse effects (Fig. 1E).

101 **The combined treatment of Molnupiravir and Favipiravir results in a marked potentiation of efficacy.**

102 Next, we studied what the combined efficacy is of suboptimal doses of Molnupiravir and Favipiravir  
103 (Fig. 2A). Treatment with Favipiravir alone (300 mg/kg, BID) reduced viral RNA and infectious virus  
104 loads in the lungs of infected animals by 0.7 ( $P=0.0009$ ) and 1.2 ( $P=0.0002$ )  $\log_{10}$ /mg tissue, respectively  
105 (Fig. 2B/C). Treatment with Molnupiravir (150 mg/kg BID) only resulted in 1.9 ( $P<0.0001$ ) and 1.3  
106 ( $P=0.0002$ )  $\log_{10}$ /mg reduction in viral RNA and infectious virus loads respectively. The combined  
107 treatment resulted in a reduction of 2.7  $\log_{10}$  viral of lung viral RNA titers (Fig. 2B), but interestingly, in  
108 a markedly enhanced reduction in infectious virus titers (4.5  $\log_{10}$  TCID<sub>50</sub> per mg lung,  $P=0.02$ ,  $P=0.0005$   
109 as compared to Molnupiravir and Favipiravir alone, respectively) (Fig. 2C). Notably, there was no  
110 detectable infectious virus in the lungs of six out of ten hamsters in the combined treatment group  
111 (Fig. 2C). A marked improvement in the histological lung pathology scores was also observed in the

112 combined treatment group (Fig. 2D) and no significant weight loss or toxicity signs were observed  
113 (Supplementary Fig. S1).

114 Molnupiravir is known to increase the mutation frequency of MERS-CoV viral RNA in infected mice <sup>5</sup>.  
115 To test whether this is also the case in SARS-CoV-2-infected hamsters, we used Illumina deep  
116 sequencing to determine the SARS-CoV-2 mutations rate in remaining viral RNA in lung samples of  
117 hamsters after treatment. A dose-dependent increase in the mutation count (in particular, C-to-T and  
118 G-to-A transitions) in samples from Molnupiravir treated hamsters was observed as compared to the  
119 vehicle control group (Supplementary Fig. S2). The Molnupiravir (150mg/kg) + Favipiravir (300 mg/kg)  
120 combination resulted in a markedly higher number of C-to-T and G-to-A mutations (68 and 50,  
121 respectively), as compared to the single dose groups [150 mg/kg Molnupiravir group (33 and 31,  
122 respectively) and 300 mg/kg Favipiravir (14 and 21, respectively)] (Fig. 2E). The C-to-T and G-to-A  
123 mutation count in the combination group was also markedly higher than in the highest dose group of  
124 Molnupiravir (45 and 39, respectively) (Supplementary Fig. S2). These results may at least partially  
125 explain the markedly enhanced reduction in infectious viral loads observed in the combination  
126 treatment group.

## 127 **Discussion**

128 Remdesivir (Veklury), is the first drug to have received FDA approval for use in hospitalised COVID19  
129 patients, although the World Health Organisation has issued a conditional recommendation against its  
130 use on 20 Nov 2020 ([www.who.int](http://www.who.int)). Remdesivir needs to be administrated intravenously which  
131 precludes its use in the early stages of the infection/disease or even a prophylactic use. We previously  
132 demonstrated that treatment of SARS-CoV-2-infected hamsters with a high doses of Favipiravir largely  
133 reduces infectious virus titers in the animals and results as a consequence in a markedly improved lung  
134 pathology <sup>4</sup>. Favipiravir is currently being studied for the treatment of COVID-19 in clinical trials in  
135 several countries and was very recently reported to result in COVID-19 patients in a faster virological  
136 response, a shorter time to clinical symptoms and reduced mortality rates (Corritori et al., Science

137 Spotlight™, CROI 2021). Also Molnupiravir has been reported to exert therapeutic and prophylactic  
138 activity against SARS-CoV-2 in several animal models<sup>9–11</sup>. Importantly very recent interim data from  
139 phase II clinical studies in COVID-19 patients, revealed a reduction in the time required to reach  
140 negative isolation of infectious virus from the nasopharyngeal swabs from participants with  
141 symptomatic SARS-CoV-2 infection (Painter et al., Science Spotlight™, CROI 2021). Both Molnupiravir  
142 and Favipiravir have a high barrier to resistance, resistant variants have a loss in fitness and induce  
143 lethal viral mutagenesis<sup>6,7</sup>.

144 We here demonstrate that the combination of suboptimal doses of Molnupiravir and Favipiravir results  
145 in a marked antiviral activity in the hamster model. Infectious virus titers were reduced to undetectable  
146 levels in 6 out of 10 treated animals. A median reduction of 4.5 log<sub>10</sub> TCID<sub>50</sub>/mg lung tissue was  
147 achieved, which is markedly more pronounced than what could be expected from an additive activity  
148 of either Molnupiravir (1.3 log<sub>10</sub>) or Favipiravir (1.1 log<sub>10</sub>) when dosed alone. This pronounced efficacy  
149 of the combination may partially or even entirely be explained by the increased total mutation count  
150 in viral RNA collected from the lungs of combo-treated hamsters as compared to the single treatment  
151 groups.

152 In conclusion, the combination of Molnupiravir and Favipiravir (two oral drugs with a high barrier to  
153 resistance for which there is very recent initial evidence that they exert antiviral activity in COVID-19  
154 patients), is particularly effective in the treatment of SARS-CoV2 infections in hamsters. This efficacy  
155 may be explained by an enhanced accumulation of mutations as compared to monotherapy. Our  
156 findings may lay the basis for the design of clinical studies to test the efficacy of the combination of  
157 Molnupiravir and Favipiravir in the treatment of COVID-19.

158

159 **Methods**

160 **SARS-CoV-2**

161 The SARS-CoV-2 strain used in this study, BetaCov/Belgium/GHB-03021/2020 (EPI ISL 109  
162 407976|2020-02-03), was recovered from a nasopharyngeal swab taken from an RT-qPCR confirmed  
163 asymptomatic patient who returned from Wuhan, China in the beginning of February 2020. A close  
164 relation with the prototypic Wuhan-Hu-1 2019-nCoV (GenBank accession 112 number MN908947.3)  
165 strain was confirmed by phylogenetic analysis. Infectious virus was isolated by serial passaging on  
166 HuH7 and Vero E6 cells <sup>4</sup>; passage 6 virus was used for the study described here. Live virus-related  
167 work was conducted in the high-containment A3 and BSL3+ facilities of the KU Leuven Rega Institute  
168 (3CAPS) under licenses AMV 30112018 SBB 219 2018 0892 and AMV 23102017 SBB 219 20170589  
169 according to institutional guidelines.

170 **Cells**

171 Vero E6 cells (African green monkey kidney, ATCC CRL-1586) were cultured in minimal essential  
172 medium (Gibco) supplemented with 10% fetal bovine serum (Integro), 1% L- glutamine (Gibco) and 1%  
173 bicarbonate (Gibco). End-point titrations were performed with medium containing 2% fetal bovine  
174 serum instead of 10%.

175 **Compounds**

176 For the first pilot experiment, EIDD-2801 was kindly provided by Calibr at Scripps Research (USA). For  
177 further studies, Molnupiravir (EIDD-2801) was purchased from Excenen Pharmatech Co., Ltd (China)  
178 and was formulated as 50 or 100 mg/ml (for groups with the highest dose) stocks in a vehicle  
179 containing 10%PEG400 and 2.5% Kolliphor-EL in water. Favipiravir was purchased from BOC Sciences  
180 (USA) and was formulated as a 50 mg/mL stock in 3% sodium bicarbonate.

181 **SARS-CoV-2 infection model in hamsters**



182 The hamster infection model of SARS-CoV-2 has been described before <sup>4,13</sup>. Housing conditions and  
183 experimental procedures were approved by the ethics committee of animal experimentation of KU  
184 Leuven (license P065-2020). For infection, female hamsters of 6-8 weeks old were anesthetized with  
185 ketamine/xylazine/atropine and inoculated intranasally with 50  $\mu$ L containing  $2 \times 10^6$  TCID<sub>50</sub> SARS-CoV-  
186 2 (day 0).

### 187 **Treatment regimen**

188 For dose-response treatment, animals were treated twice daily with 75, 150 or 200 mg/kg of EIDD-  
189 2801 by oral gavage just before infection with SARS-CoV-2. For combination therapy, hamsters were  
190 treated from day 0 with 150 mg/kg EIDD-2801 (oral gavage) and 300 mg/kg Favipiravir (intraperitoneal,  
191 i.p.) twice daily. All the treatments continued until day 3 pi. Hamsters were monitored for appearance,  
192 behavior and weight. At day 4 pi, hamsters were euthanized by i.p. injection of 500  $\mu$ L Dolethal  
193 (200mg/mL sodium pentobarbital, Vétoquinol SA). Lungs were collected and viral RNA and infectious  
194 virus were quantified by RT-qPCR and end-point virus titration, respectively.

### 195 **SARS-CoV-2 RT-qPCR**

196 Hamster lung tissues were collected after sacrifice and were homogenized using bead disruption  
197 (Precellys) in 350  $\mu$ L TRK lysis buffer (E.Z.N.A.<sup>®</sup> Total RNA Kit, Omega Bio-tek) and centrifuged (10.000  
198 rpm, 5 min) to pellet the cell debris. RNA was extracted according to the manufacturer's instructions.  
199 RT-qPCR was performed on a LightCycler96 platform (Roche) as described before <sup>4</sup>.

### 200 **End-point virus titrations**

201 Lung tissues were homogenized using bead disruption (Precellys) in 350  $\mu$ L minimal essential medium  
202 and centrifuged (10,000 rpm, 5min, 4°C) to pellet the cell debris. To quantify infectious SARS-CoV-2  
203 particles, endpoint titrations were performed as described before <sup>4</sup>.

### 204 **Histology**

205 For histological examination, the lungs were fixed overnight in 4% formaldehyde and embedded in  
206 paraffin. Tissue sections (5  $\mu$ m) were analyzed after staining with hematoxylin and eosin and scored  
207 blindly for lung damage by an expert pathologist. The scored parameters, to which a cumulative score  
208 of 1 to 3 was attributed, were the following: congestion, intra-alveolar hemorrhagic, apoptotic bodies  
209 in bronchus wall, necrotizing bronchiolitis, perivascular edema, bronchopneumonia, perivascular  
210 inflammation, peribronchial inflammation and vasculitis.

### 211 **Deep sequencing and analysis of whole genome sequences**

212 Genomic sequences from all samples were obtained using SureSelect<sup>XT</sup> target enrichment and Illumina  
213 sequencing. Reads generated were trimmed with Trim Galore  
214 (<https://github.com/FelixKrueger/TrimGalore>). Duplicated reads were removed using Picard  
215 (<http://broadinstitute.github.io/picard>). Reads from the inoculation sample were mapped to the SARS-  
216 CoV-2 reference genome (NC\_045512) from GenBank using BWA-MEM<sup>14</sup>. The mapping quality was  
217 checked using Qualimap and the consensus whole genome sequence was generated using QUASR<sup>15,16</sup>.  
218 Reads from the lung samples were mapped to this unique reference sequence. Genomes with less than  
219 less than a 100 read depth were excluded. Variants above 1% and with a minimum of 2 supporting  
220 reads per strand were identified at sites with a read depth of  $\geq 10$  using VarScan<sup>17</sup>.

### 221 **Statistics**

222 GraphPad Prism (GraphPad Software, Inc.) was used to perform statistical analysis. Statistical  
223 significance was determined using the non-parametric Mann Whitney U-test. P-values of  $\leq 0.05$  were  
224 considered significant.

### 225 **Data Availability**

226 All of the data generated or analysed during this study are included in this published article.

227 **Acknowledgments**

228 We thank Carolien De Keyzer, Lindsey Bervoets, Thibault Francken, Elke Maas, Jasper Rymenants, Birgit  
229 Voeten, Dagmar Buyst, Niels Cremers, Bo Corbeels and Kathleen Van den Eynde for excellent technical  
230 assistance. We are grateful to Piet Maes for kindly providing the SARS-CoV-2 strain used in this study.  
231 We thank Prof. Jef Arnout and Dr. Annelies Sterckx (KU Leuven Faculty of Medicine, Biomedical  
232 Sciences Group Management) and Animalia and Biosafety Departments of KU Leuven for facilitating  
233 the animal studies. This project has received funding from the Covid-19-Fund KU Leuven/UZ Leuven  
234 and the COVID-19 call of FWO (G0G4820N), the European Union's Horizon 2020 research and  
235 innovation program under grant agreements No 101003627 (SCORE project) and Bill & Melinda Gates  
236 Foundation (BGMF) under grant agreement INV-00636. Sequencing was performed by the Pathogen  
237 Genomics Unit at UCL. R.A., C.S.F. and L.L. were supported by a KU Leuven internal project fund. X.Z.  
238 received funding of the China Scholarship Council (grant No.201906170033). J.B. receives funding from  
239 the NIHR UCL/UCLH Biomedical Research Centre. J.P. is funded by the Rosetrees Trust.

240 **Author Contributions**

241 R.A., C.S.F. and J.N. designed the studies; R.A., C.S.F., S.J.F.K., X.Z., J.B., J.P. and L.L. performed the  
242 studies ; R.A., C.S.F., J.B, J.P. and B.W. analyzed data; D.J. and J.N. provided advice on the interpretation  
243 of data; R.A., C.S.F. and J.N. wrote the paper with input from co-authors; A.K.C. and S.D.J provided  
244 essential reagents; V.G. and E.H. provided and facilitated access to essential infrastructure; R.A., C.S.F.,  
245 R.W. and J.N. supervised the study; L.V., L.C., P.L., J.N. and K.D. acquired funding.

246 **Competing Interest Statement:** None to declare.

247

248 **References**

- 249 1. Zhu, N. *et al.* A Novel Coronavirus from Patients with Pneumonia in China, 2019. *N. Engl. J.*  
250 *Med.* **382**, 727–733 (2020).
- 251 2. Tay, M. Z., Poh, C. M., Rénia, L., MacAry, P. A. & Ng, L. F. P. The trinity of COVID-19: immunity,  
252 inflammation and intervention. *Nature Reviews Immunology* **20**, 363–374 (2020).
- 253 3. Delang, L. & Neyts, J. Medical treatment options for COVID-19. *Eur. Hear. J. Acute Cardiovasc.*  
254 *Care* 204887262092279 (2020). doi:10.1177/2048872620922790
- 255 4. Kaptein, S. J. F. *et al.* Favipiravir at high doses has potent antiviral activity in SARS-CoV-  
256 2-infected hamsters, whereas hydroxychloroquine lacks activity. *Proc. Natl. Acad. Sci. U. S. A.*  
257 **117**, 26955–26965 (2020).
- 258 5. Sheahan, T. P. *et al.* An orally bioavailable broad-spectrum antiviral inhibits SARS-CoV-2 in  
259 human airway epithelial cell cultures and multiple coronaviruses in mice. *Sci. Transl. Med.* **12**,  
260 (2020).
- 261 6. Urakova, N. *et al.*  $\beta$ -D- N 4 -Hydroxycytidine Is a Potent Anti-alphavirus Compound That  
262 Induces a High Level of Mutations in the Viral Genome . *J. Virol.* **92**, (2017).
- 263 7. Delang, L., Abdelnabi, R. & Neyts, J. Favipiravir as a potential countermeasure against  
264 neglected and emerging RNA viruses. *Antiviral Research* **153**, 85–94 (2018).
- 265 8. Toots, M. *et al.* Characterization of orally efficacious influenza drug with high resistance  
266 barrier in ferrets and human airway epithelia. *Sci. Transl. Med.* **11**, (2019).
- 267 9. Rosenke, K. *et al.* Orally delivered MK-4482 inhibits SARS-CoV-2 replication in the Syrian  
268 hamster model. *Res. Sq.* (2020).
- 269 10. Wahl, A. *et al.* Acute SARS-CoV-2 Infection is Highly Cytopathic, Elicits a Robust Innate  
270 Immune Response and is Efficiently Prevented by EIDD-2801. *Res. Sq.* (2020).

- 271 11. Cox, R. M., Wolf, J. D. & Plemper, R. K. Therapeutically administered ribonucleoside analogue  
272 MK-4482/EIDD-2801 blocks SARS-CoV-2 transmission in ferrets. *Nat. Microbiol.* (2020).
- 273 12. Painter, W. P. *et al.* Human Safety, Tolerability, and Pharmacokinetics of Molnupiravir, a Novel  
274 Broad-Spectrum Oral Antiviral Agent with Activity Against SARS-CoV-2. *Antimicrob. Agents*  
275 *Chemother.* (2021). doi:10.1128/AAC.02428-20
- 276 13. Boudewijns, R. *et al.* STAT2 signaling restricts viral dissemination but drives severe pneumonia  
277 in SARS-CoV-2 infected hamsters. *Nat. Commun.* **11**, 5838 (2020).
- 278 14. Li, H. & Durbin, R. Fast and accurate short read alignment with Burrows-Wheeler transform.  
279 *Bioinformatics* **25**, 1754–1760 (2009).
- 280 15. Okonechnikov, K., Conesa, A. & García-Alcalde, F. Qualimap 2: Advanced multi-sample quality  
281 control for high-throughput sequencing data. *Bioinformatics* **32**, 292–294 (2016).
- 282 16. Watson, S. J. *et al.* Viral population analysis and minority-variant detection using short read  
283 next-generation sequencing. *Philos. Trans. R. Soc. B Biol. Sci.* **368**, (2013).
- 284 17. Koboldt, D. C. *et al.* VarScan 2: Somatic mutation and copy number alteration discovery in  
285 cancer by exome sequencing. *Genome Res.* **22**, 568–576 (2012).

286

287

288

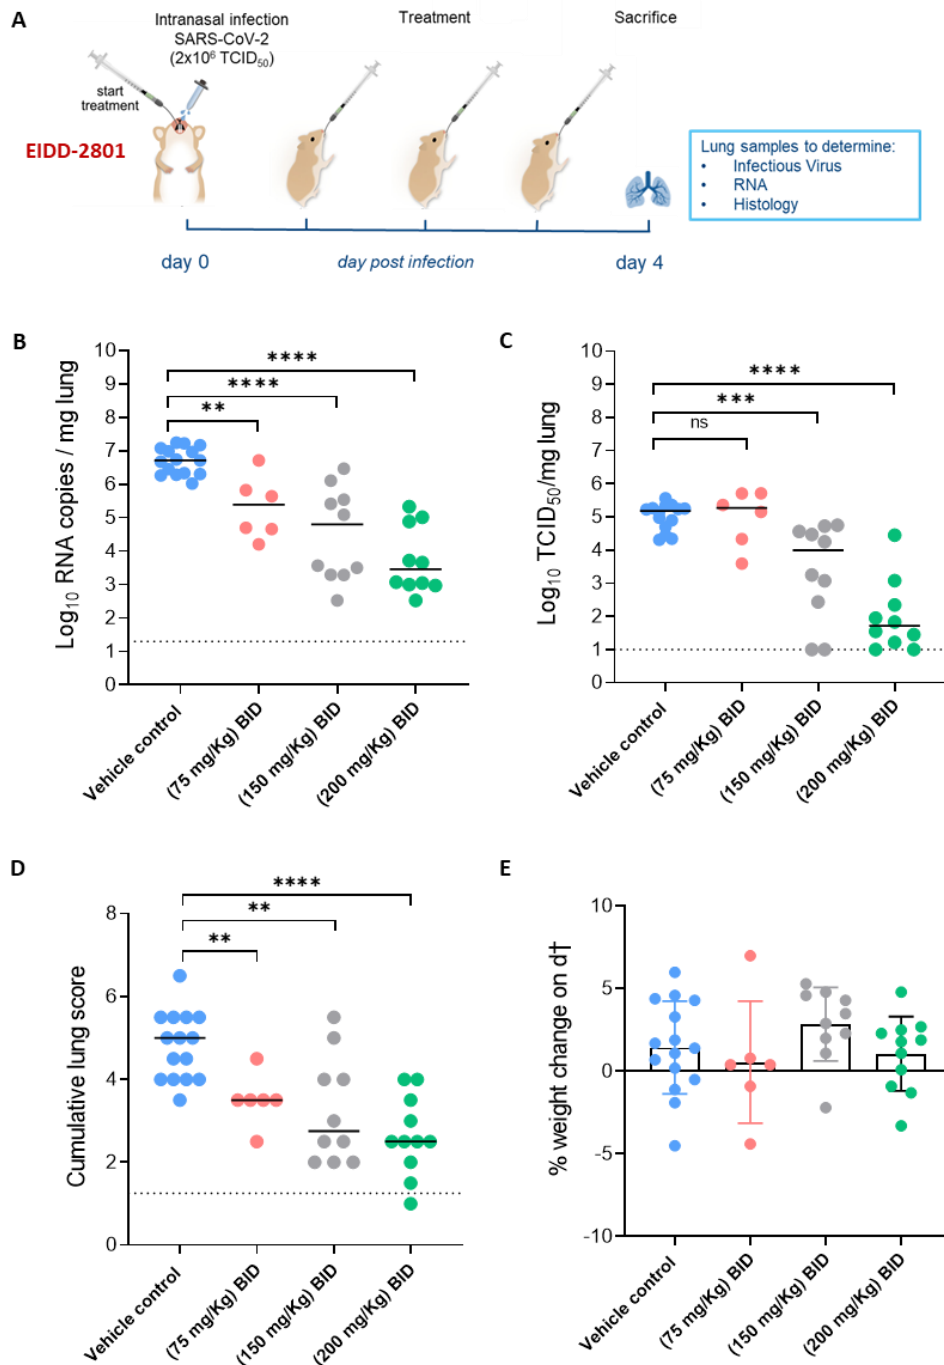

289

290 **Fig.1. Dose-response efficacy of Molnupiravir (EIDD-2801) against SARS-CoV-2 in a hamster infection model.**

291 (A) Set-up of the study. (B) Viral RNA levels in the lungs of control (vehicle-treated) and EIDD-2801-treated (75,  
 292 150 or 200 mg/kg, BID) SARS-CoV-2-infected hamsters at day 4 post-infection (pi) are expressed as log<sub>10</sub> SARS-  
 293 CoV-2 RNA copies per mg lung tissue. Individual data and median values are presented. (C) Infectious viral loads  
 294 in the lungs of control (vehicle-treated) and EIDD-2801-treated SARS-CoV-2-infected hamsters at day 4 pi are  
 295 expressed as log<sub>10</sub> TCID<sub>50</sub> per mg lung tissue. Individual data and median values are presented. (D) Cumulative  
 296 severity score from H&E stained slides of lungs from control (vehicle-treated) and EIDD-2801-treated SARS-CoV-  
 297 2-infected hamsters. Individual data and median values are presented and the dotted line represents the median  
 298 score of untreated non-infected hamsters. (E) Weight change at day 4 pi in percentage, normalized to the body  
 299 weight at the time of infection. Bars represent means ± SD. Data were analyzed with the Mann-Whitney U test.  
 300 \*P < 0.05, \*\*P < 0.01, \*\*\*P < 0.001, \*\*\*\*P < 0.0001, ns=non-significant. All data (panels B, C, D, E) are from two  
 301 independent experiments except for the 75 mg/kg group. The number of animals were 15, 6, 10, and 10 for  
 302 respectively the vehicle 75, 150, and 200 mg/kg condition.

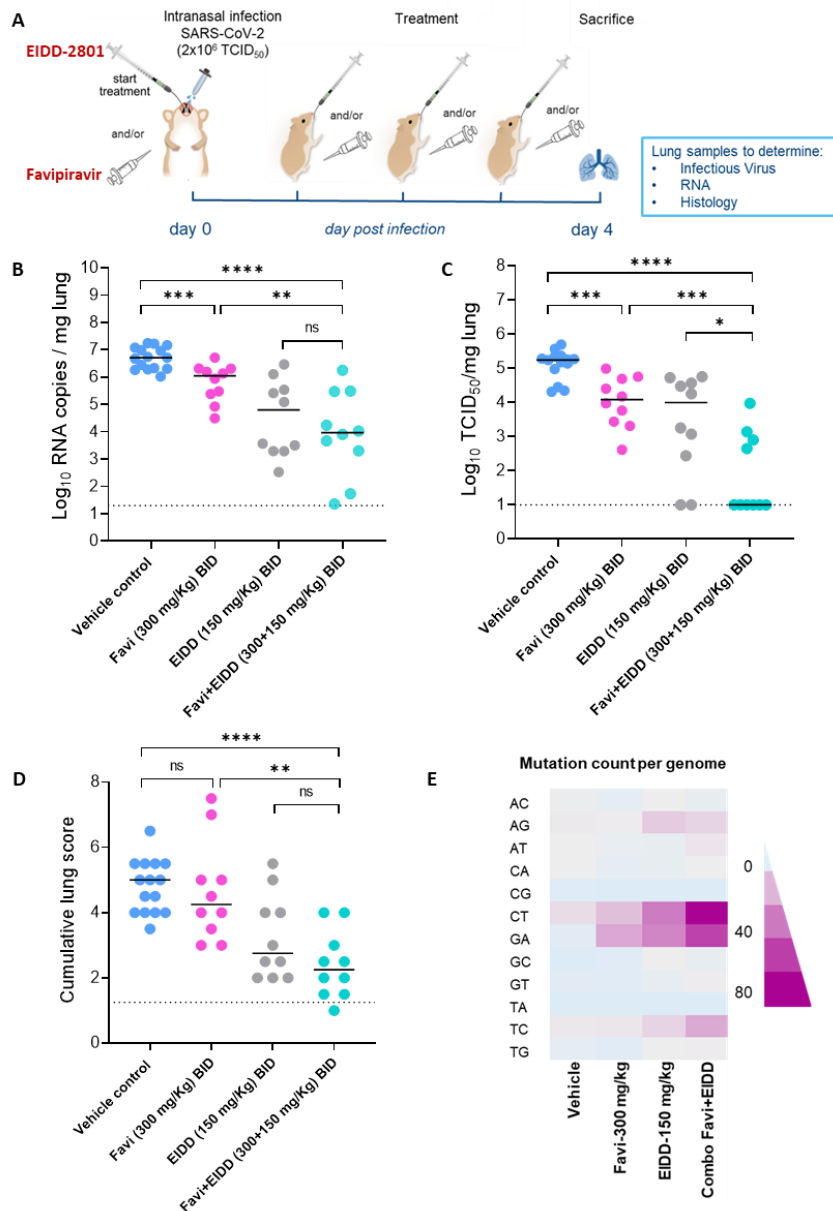

303

304 **Fig.2. Combined efficacy of Favipiravir and Molnupiravir (EIDD-2801) against SARS-CoV-2 in a hamster infection**  
 305 **model.** (A) Set-up of the study. (B) Viral RNA levels in the lungs of control (vehicle-treated), Favipiravir-treated  
 306 (300 mg/kg, BID), EIDD-2801-treated (150 mg/kg, BID) and combination-treated (Favipiravir+EIDD-2801 at  
 307 300+150 mg/kg, BID, respectively) SARS-CoV-2-infected hamsters at day 4 post-infection (pi) are expressed as  
 308 log<sub>10</sub> SARS-CoV-2 RNA copies per mg lung tissue. Individual data and median values are presented. (C) Infectious  
 309 viral loads in the lungs of control (vehicle-treated), Favipiravir-treated, EIDD-2801-treated and combination-  
 310 treated (Favipiravir+EIDD-2801) SARS-CoV-2-infected hamsters at day 4 pi are expressed as log<sub>10</sub> TCID<sub>50</sub> per mg  
 311 lung tissue. Individual data and median values are presented. (D) Cumulative severity score from H&E stained  
 312 slides of lungs from control (vehicle-treated), Favipiravir-treated, EIDD-2801-treated and combination-treated  
 313 (Favipiravir+EIDD-2801) SARS-CoV-2-infected hamsters. Individual data and median values are presented and  
 314 the dotted line represents the median score of untreated non-infected hamsters. (E) Mean mutation count (per  
 315 the whole genome) in the viral RNA isolated from the lungs of control (vehicle-treated), Favipiravir-treated (300  
 316 mg/kg, BID), EIDD-2801-treated (150 mg/kg, BID) and combination-treated (Favipiravir+EIDD-2801 at 300+150  
 317 mg/kg, BID, respectively) SARS-CoV-2-infected hamsters at day 4 post-infection (pi). Data were analyzed with  
 318 the Mann-Whitney U test. \*P < 0.05, \*\*P < 0.01, \*\*\*P < 0.001, \*\*\*\*P < 0.0001, ns=non-significant.  
 319 Favipiravir, EIDD=EIDD-2801. All data (panels B, C, D) are from two independent experiments with 15, 10,  
 320 10 and 10 animals for respectively the vehicle, Favipiravir 300 mg/kg, EIDD-2801 150 mg/kg and Favipiravir+EIDD-  
 321 2801 condition.

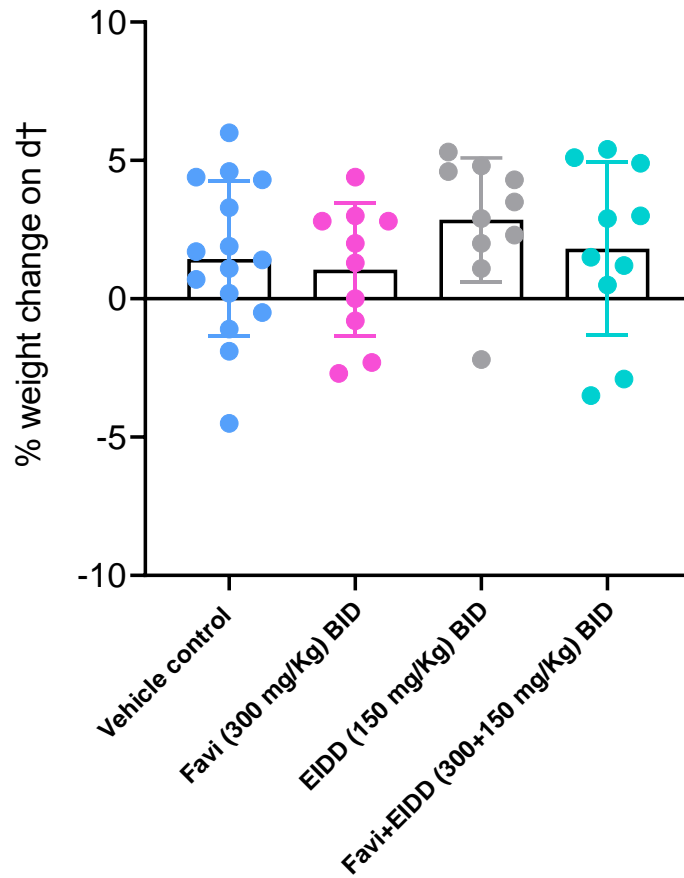

322

323 **Fig. S1. Tolerability of combined treatment with Favipiravir and EIDD-2801 in SARS-CoV-2-infected hamsters.**

324 Weight change at day 4 post-infection in percentage, normalized to the body weight at the time of infection.

325 Bars represent means  $\pm$  SD.

326



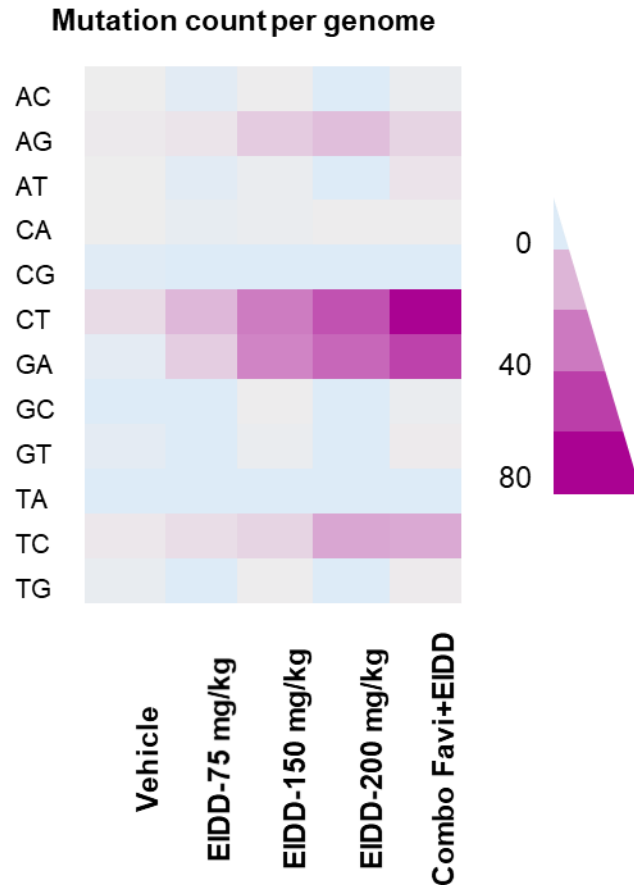

327

328 **Fig. S2. Dose-dependent increase in mutation count in SARS-CoV-2 viral RNA by Molnupiravir (EIDD-2801).**  
329 Mean mutation count (per the whole genome) in the viral RNA isolated from the lungs of control (vehicle-  
330 treated), EIDD-2801-treated (75, 150 or 200 mg/kg, BID) and combination-treated (Favipiravir+EIDD-2801 at  
331 300+150 mg/kg, BID, respectively) SARS-CoV-2-infected hamsters at day 4 post-infection (pi).

332

333

334
